# Supplementary material for: The dynamics of GII.4 Norovirus in Ho Chi Minh City, Vietnam
Source: PubMed Central journal article supplement (PMC4047827; doi:10.1016/j.meegid.2013.04.014), 2013-08

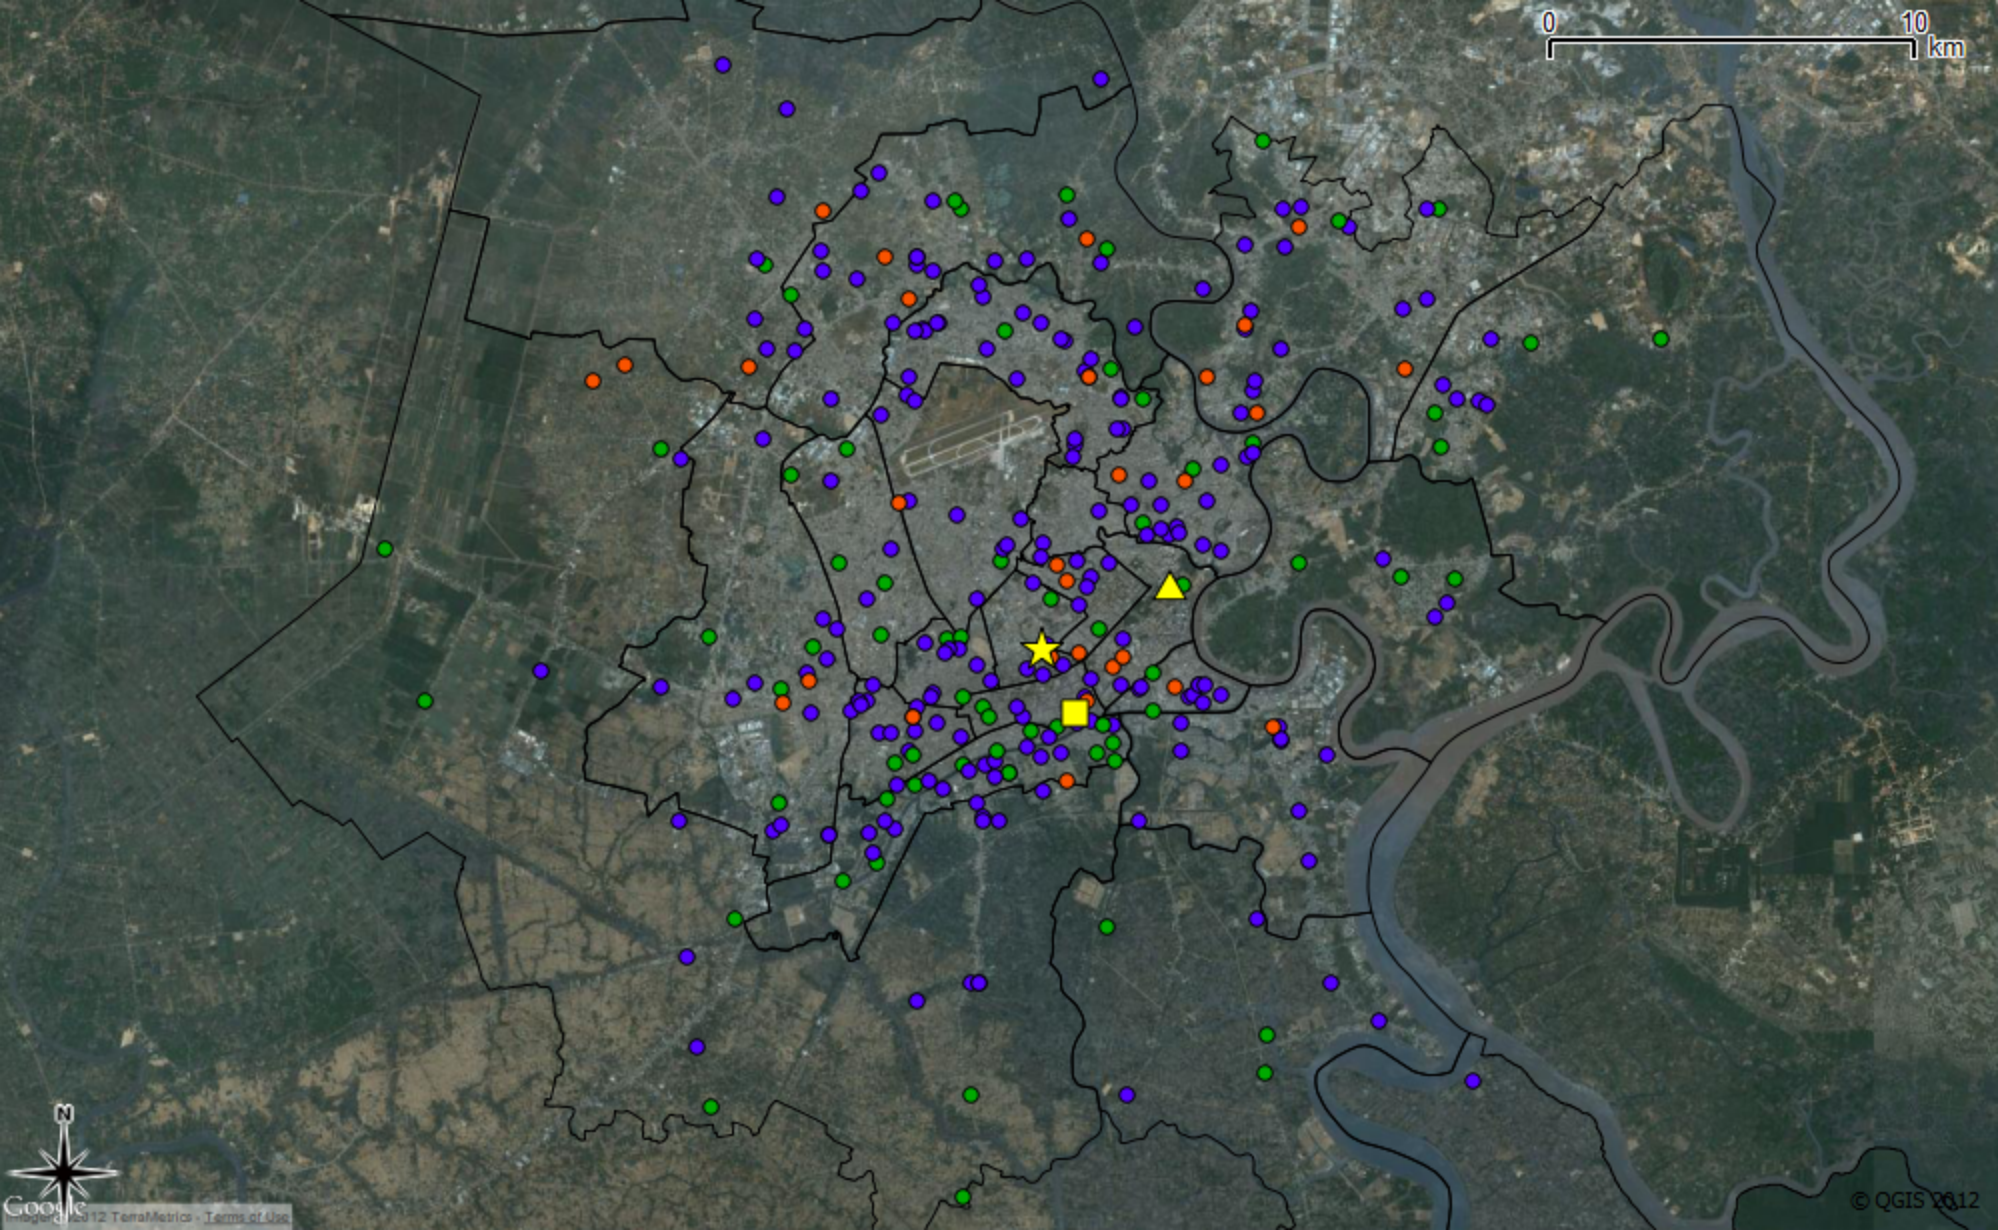

Supplement: mmc1.pdf [file mmc1.pdf]
